# Supplementary material for: Little Evidence for Genetic Susceptibility to Influenza A (H5N1) from Family Clustering Data
Source: PubMed Central journal article supplement (PMC2878232; doi:10.3201/eid1307.061538), 2007-07
Supplement: 06-1538_Techapp-s1.pdf [file 06-1538_Techapp-s1.pdf]

## Technical Appendix: Supplementary Methods

### Estimation of the Proportion of Clusters Limited to Blood Relatives

The expected proportion of clusters limited to blood relatives,  $p_B$ , for nuclear families (consisting of two parents and a defined number of children who are the offspring of both parents) who experience a common exposure to an avian influenza virus is given by

$$p_B = 1 - \frac{\tau^2}{1 - (1 - \tau)^n - n\tau(1 - \tau)^{n-1}}. \quad (1)$$

Here  $\tau^2$  is the probability that both parents are infected (hence the cluster is not restricted to blood relatives) and the denominator is the probability that any two or more persons in the household are infected, i.e., the probability of a household cluster. The model can easily be generalized to more complicated family structures.

Formally, let  $p_B = \Pr(BC | C)$  where  $BC$  is the event that a family has a cluster of cases only in blood relatives, and  $C$  is the event that the family has a cluster of cases, i.e. more than one case. By the law of conditional probability,

$$p_B = \Pr(BC | C) = \frac{\Pr(BC \cap C)}{\Pr(C)} = \frac{\Pr(BC)}{\Pr(C)} = \frac{\Pr(C) - \Pr(NBC)}{\Pr(C)} = 1 - \frac{\Pr(NBC)}{\Pr(C)} \quad (2)$$

where  $NBC$  is the event that a family has a cluster including non-blood relatives: in this case, including both parents. Since a family cluster is defined as two or more cases in a family,  $\Pr(C) = 1 - \Pr(0 \text{ cases}) - \Pr(1 \text{ case})$ . The simple binomial probabilities of having 0 or 1 case in the family are given by:  $\Pr(0 \text{ cases}) = (1 - \tau)^n$  and  $\Pr(1 \text{ case}) = n\tau(1 - \tau)^{n-1}$ . The probability that the two parents will be infected is just  $\tau^2$ . Substituting into equation (2) we obtain equation (1).

### Accounting for Extended Family Structures

While our null model assumes a nuclear family structure, at least 11 out of the 36 clusters described here include members of the extended family (Appendix Table). We can account for such extended family structures by substituting  $u\tau^2$ , where  $u$  is the number of pairs of unrelated family members, for  $\Pr(NBC)$  in equation (2) when  $\tau$  is small, i.e. nearly all clusters are of size 2. Similarly, when  $\tau$  is small, the denominator also includes only clusters of size 2 and can be approximated as

$$\binom{n}{2} \tau^2.$$

To take an arbitrary example, if we assume all families have an extended family structure such as the one depicted in Figure S1, there are  $u = 6$  pairs of unrelated family members; therefore, the proportion of clusters limited to blood relatives occurring among such families would be:

$$p_B \approx 1 - \frac{6\tau^2}{\binom{8}{2}\tau^2} = 1 - \frac{6}{28} = \frac{11}{14}.$$

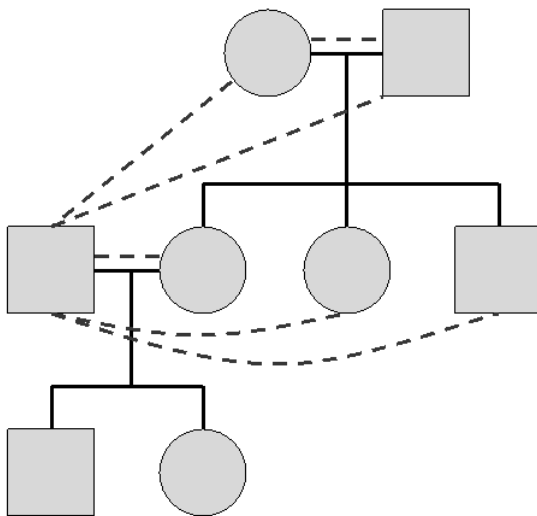

Technical Appendix Figure. Example of an extended family pedigree. There are 8 family members (2 parents, their 3 children, son-in-law, and 2 grandchildren) and 6 pairs of non-blood relatives (depicted by the dashed lines).

Technical Appendix Table. Family clusters of influenza A (H5N1), Dec 2003–Dec 2006\*

| Cluster | Onset of index case | Country   | Age, y/Sex | Relation to index case | H5N1  | Onset   | Outcome |
|---------|---------------------|-----------|------------|------------------------|-------|---------|---------|
| 1       | Dec/03              | Viet. (N) | 12/F       | Self                   | +     | Dec 25  | D       |
|         |                     |           | 30/F       | Mother                 | +     | Jan 1   | D       |
| 2       | Dec/03              | Viet. (N) | 5/M        | Self                   | +     | Dec 29† | D       |
|         |                     |           | 7/F        | Sister                 | NT    | NN      | D       |
| 3       | Jan/04              | Viet. (N) | 31/M       | Self                   | NT    | Jan 7†  | D       |
|         |                     |           | 30/F       | Sister                 | +     | Jan 10  | D       |
|         |                     |           | 28/F       | Wife                   | +     | Jan 10  | R       |
|         |                     |           | 23/F       | Sister                 | +     | Jan 11  | D       |
| 4       | Jan/04              | Thailand  | 6/M        | Self                   | +     | Jan 8   | D       |
|         |                     |           | 33/F       | Mother                 | NT    | Jan 8   | D       |
| 5       | Jul/04              | Viet. (S) | 19/M       | Self                   | NT    | Jul 23  | D       |
|         |                     |           | 22/F       | Cousin                 | NT    | NN      | D       |
|         |                     |           | 25/F       | Sister                 | +     | Jul 31  | D       |
| 6       | Sep/04              | Thailand  | 11/F       | Self                   | NT    | Sep 2   | D       |
|         |                     |           | 26/F       | Mother                 | +     | Sep 11  | D       |
|         |                     |           | 32/F       | Aunt                   | +     | Sep 16  | R       |
| 7       | Dec/04              | Viet. (N) | 46/M       | Self                   | +     | Dec 26  | D       |
|         |                     |           | 42/M       | Brother                | +     | Jan 10† | R       |
|         |                     |           | 36/M       | Brother                | +     | Not ill | Not ill |
| 8       | Jan/05              | Viet. (S) | 17/M       | Self                   | +     | Jan 10† | D       |
|         |                     |           | 22/F       | Sister                 | NN    | NN      | Unk#    |
| 9       | Jan/05              | Viet (S)  | 35/F       | Self                   | +     | Jan 14  | D       |
|         |                     |           | 13/F       | Daughter               | +     | Jan 20  | D       |
| 10      | Jan/05              | Camb.     | 14/M       | Self                   | NT    | NN      | D       |
|         |                     |           | 25/F       | Sister                 | +     | Jan 21  | D       |
|         |                     |           | 21/M       | Self                   | +     | Feb 14  | Unk#    |
| 11      | Feb/05              | Viet. (N) | 14/F       | Sister                 | +     | Feb 23  | Unk#    |
|         |                     |           | 80/M       | Grandfather            | +     | Not ill | Not ill |
|         |                     |           | 69/M       | Self                   | +     | Feb 19  | D       |
| 12      | Feb/05              | Viet. (N) | 61/F       | Wife                   | +     | Not ill | Not ill |
|         |                     |           | 13         | Mar/05                 | Viet. | 13/F    | Self    |
| 5/M     | Brother             | +         | Mar 12†    |                        |       | R       |         |
| 14      | Mar/05              | Viet. (N) | Adult/F    | Aunt                   | P     | NN      | Unk#    |
|         |                     |           | 39/M       | Self                   | +     | Mar 22† | Unk#    |
|         |                     |           | Adult/F    | Wife                   | +     | Mar 22† | Unk#    |
|         |                     |           | 4 mo/NN    | Child                  | +     | Mar 22† | Unk#    |
|         |                     |           | 3/NN       | Child                  | +     | Mar 22† | Unk#    |
| 15      | Jul/05              | Indonesia | 10/NN      | Child                  | +     | Mar 22† | Unk#    |
|         |                     |           | 8/F        | Self                   | +     | Jun 24  | D       |
|         |                     |           | 1/F        | Sister                 | NT    | Jun 29  | D       |
| 16      | Sep/05              | Indonesia | 38/M       | Father                 | +     | Jul 2   | D       |
|         |                     |           | 21/M       | Self                   | +     | Sep 20  | Unk#    |
| 17      | Oct/05              | Thailand  | 4/M        | Nephew                 | +     | Oct 4   | R       |
|         |                     |           | 48/M       | Self                   | +     | Oct 13  | D       |
| 18      | Oct/05              | Indonesia | 7/M        | Son                    | +     | Oct 16  | Unk#    |
|         |                     |           | 19/F       | Self                   | +     | Oct 19  | D       |
| 19      | Oct/05              | China     | 8/M        | Brother                | +     | Oct 25  | Unk#    |
|         |                     |           | 12/F       | Self                   | NT    | 16 Oct  | D       |
| 20      | Nov/05              | Indonesia | 9/M        | Brother                | +     | 17 Oct  | R       |
|         |                     |           | 7/M        | Self                   | NT    | 3 Nov   | D       |
| 21      | Dec/05              | Turkey    | 20/M       | Brother                | NT    | 3 Nov   | D       |
|         |                     |           | 16/M       | Brother                | +     | 6 Nov   | Unk#    |
|         |                     |           | 14/M       | Self                   | +     | 26 Dec  | D       |
| 22      | Dec/05              | Turkey    | 15/F       | Sister                 | +     | 28 Dec  | D       |
|         |                     |           | 12/F       | Sister                 | +     | 28 Dec  | D       |
|         |                     |           | 9/F        | Self                   | +     | 29 Dec  | R       |
| 23      | Jan/06              | Turkey    | 3/M        | Brother                | +     | 30 Dec  | R       |
|         |                     |           | 5/M        | Self                   | +     | 8 Jan   | R       |
| 24      | Jan/06              | Indonesia | 14/F       | Sister                 | +     | 8 Jan   | D       |
|         |                     |           | 13/F       | Self                   | +     | 6 Jan   | D       |
|         |                     |           | 4/M        | Brother                | +     | 8 Jan   | D       |

|    |        |           |         |         |    |         |      |
|----|--------|-----------|---------|---------|----|---------|------|
| 25 | Jan/06 | Iraq      | 15/F    | Self    | +  | 17 Jan† | D    |
|    |        |           | 39/M    | Uncle   | +  | 18 Jan  | D    |
| 26 | Feb/06 | Azer.     | 17/F    | Self    | +  | 23 Feb† | D    |
|    |        |           | 20/F    | Cousin  | +  | 3 Mar†  | D    |
|    |        |           | 16/M    | Cousin  | +  | 10 Mar† | D    |
|    |        |           | 17/F    | Friend  | +  | 8 Mar†  | D    |
| 27 | Mar/06 | Azer.     | 15/F    | Self    | +  | 11 Mar  | R    |
|    |        |           | 17/F    | Cousin  | +  | 11 Mar  | R    |
| 28 | Mar/06 | Egypt     | 6/F     | Self    | +  | NN      | Unk# |
|    |        |           | 18 mo/F | Sister  | +  | NN      | Unk# |
| 29 | Apr/06 | Indonesia | 37/F    | Self    | NT | 27 Apr  | D    |
|    |        |           | 15/M    | Son     | +  | 9 May†  | D    |
|    |        |           | 17/M    | Son     | +  | 12 May† | D    |
|    |        |           | 28/F    | Sister  | +  | 10 May† | D    |
|    |        |           | 18 mo/F | Niece   | +  | 14 May† | D    |
|    |        |           | 25/M    | Brother | +  | NN      | Unk# |
|    |        |           | 10/M    | Nephew  | +  | 13 May† | D    |
|    |        |           | 32/M    | Brother | +  | 15 May  | D    |
| 30 | May/06 | Indonesia | 10/F    | Self    | +  | 16 May  | D    |
|    |        |           | 18/M    | Brother | +  | 16 May  | D    |
| 31 | May/06 | Indonesia | 15 F    | Self    | +  | 17 May  | Unk# |
|    |        |           | 27 M    | Brother | +  | 28 May  | R    |
| 32 | May/06 | Indonesia | 7/F     | Self    | +  | 26 May  | D    |
|    |        |           | 10/M    | Brother | NT | 29 May† | D    |
| 33 | Jul/06 | Indonesia | 17M     | Self    | +  | 26 Jul  | R    |
|    |        |           | 20M     | Cousin  | NT | 26 Jul  | D    |
| 34 | Sep/06 | Indonesia | 11M     | Self    | +  | 16 Sep  | D    |
|    |        |           | 21F     | Sister  | +  | 19 Sep  | Unk# |
| 35 | Sep/06 | Indonesia | 24 M    | Self    | NT | 16 Sep  | D    |
|    |        |           | 20M     | Brother | +  | 17 Sep  | D    |
| 36 | Dec/06 | Egypt     | 30F     | Self    | +  | 17 Dec† | D    |
|    |        |           | 16F     | Niece   | +  | 19 Dec† | D    |
|    |        |           | 26M     | Brother | +  | 17 Dec† | D    |

\*Camb., Cambodia; D, respiratory death; N, north; NT, not tested; NN, not noted; P, pending; R, recovered; S, south; Unk, unknown; Viet., Vietnam; Azer., Azerbaijan.

†Date of hospitalization.

‡Date of death.

#Had respiratory symptoms, was hospitalized (unknown for #13 and #29), and outcome was unknown.
